# Supplementary material for: A Monoclonal Antibody That Tracks Endospore Formation in the Microsporidium Nosema bombycis
Source: PubMed Central journal article supplement (PMC4374874; doi:10.1371/journal.pone.0121884), 2015-03-26

Supplemental Figure 1: MALDI-TOF MS spectra of 50 kDa protein. The mAb 2B10 were used to IP from the soluble protein of *Nosema bombycis*. And IP sample were separated by SDS-PAGE, the 50 kDa protein band were excised and digested by trypsin and submitted to MALDI-TOF MS analysis.

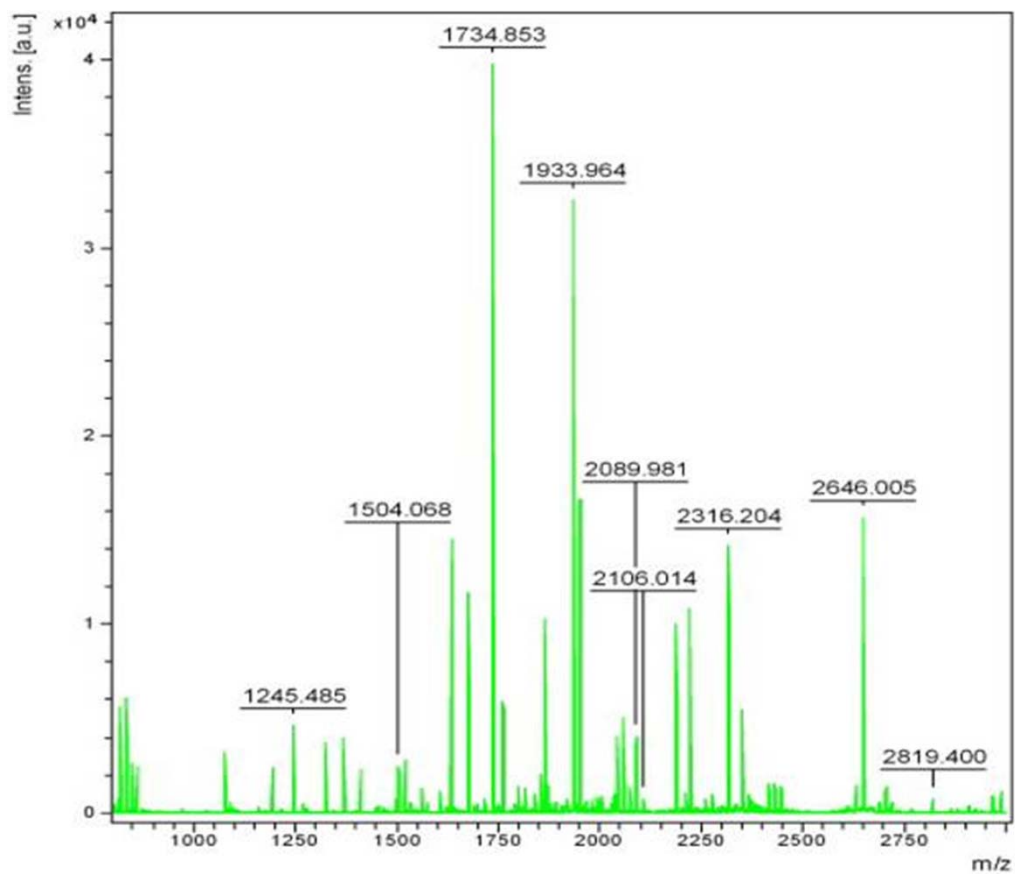

Supplement: pone.0121884.s001.pdf [file pone.0121884.s001.pdf]
